# Supplementary material for: Aerosol spectral optical properties in the Paris urban area and its peri-urban and forested surroundings during summer 2022 from ACROSS surface observations
Source: Copernicus journal article supplement (doi:10.5194/acp-25-3161-2025), 2025-03-14
Supplement: Supplementary file 1 [file acp-25-3161-2025-supplement.zip]

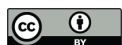

*Supplement of*

**Aerosol spectral optical properties in the Paris urban area and its peri-urban and forested surroundings during summer 2022 from ACROSS surface observations**

**Ludovico Di Antonio et al.**

*Correspondence to:* Ludovico Di Antonio ([ludovico.diantonio@lisa.ipsl.fr](mailto:ludovico.diantonio@lisa.ipsl.fr)) and  
Claudia Di Biagio ([claudia.dibiagio@lisa.ipsl.fr](mailto:claudia.dibiagio@lisa.ipsl.fr))

- [acp-25-3161-2025-supplement-title-page.pdf](#)
- [DiAntonio\\_et\\_al\\_2024\\_Supplementary\\_Video.mp4](#)
- [Supplementary\\_DiAntonio\\_etal\\_CRI\\_v4.pdf](#)

The copyright of individual parts of the supplement might differ from the article licence.
